# Supplementary material for: Syntheses and magnetic properties of a bis-bidentate nitronyl nitroxide radical based on triazolopyrimidine and its metal complexes
Source: Royal Society of Chemistry journal article supplement (doi:10.1039/d3dt01277h), 2023-01-01
Supplement: d3dt01277h1.pdf [file d3dt01277h1.pdf]

## Supporting Information

### Syntheses and magnetic properties of a bis-bidentate nitronyl nitroxide radical based on triazolopyrimidine and its metal complexes

Cheng-Cai Xia,<sup>a</sup> Xin-Yu Zhang,<sup>a</sup> Cheng-Cheng Zhang,<sup>a</sup> Gang Li,<sup>a</sup> Hai-Yan Wei<sup>\*,b</sup> and Xin-Yi Wang<sup>\*,a</sup>

<sup>a</sup>State Key Laboratory of Coordination Chemistry, Collaborative Innovation Center of Advanced Microstructures, School of Chemistry and Chemical Engineering, Nanjing University, Nanjing, 210023, China. E-mail: [wangxy66@nju.edu.cn](mailto:wangxy66@nju.edu.cn)

<sup>b</sup> Jiangsu Key Laboratory of Biofunctional Materials, School of Chemistry and Materials Science, Nanjing Normal University, Nanjing, 210023, China. Email: [weihaiyan@njnu.edu.cn](mailto:weihaiyan@njnu.edu.cn)

|                                                                                                                                                 |    |
|-------------------------------------------------------------------------------------------------------------------------------------------------|----|
| 1. X-ray crystallography and powder x-ray diffraction                                                                                           | 2  |
| Table S1 Crystallographic data and structure refinement parameters for <b>NIT-2-TrzPm</b> radical.                                              | 2  |
| Table S2 Selected bond lengths [Å] and angles [°] for <b>NIT-2-TrzPm</b> radical.                                                               | 3  |
| Table S3 Selected bond lengths [Å] and angles [°] for complex <b>1<sub>Mn</sub></b> .                                                           | 3  |
| Table S4 Selected bond lengths [Å] and angles [°] for complex <b>2<sub>Co</sub></b> .                                                           | 4  |
| Table S5 Selected bond lengths [Å] and angles [°] for complex <b>3<sub>Mn</sub></b> .                                                           | 5  |
| Table S6 Selected bond lengths [Å] and angles [°] for complex <b>4<sub>Co</sub></b> .                                                           | 7  |
| Table S7 Selected bond lengths [Å] and angles [°] for complex <b>5<sub>Mn</sub></b> .                                                           | 8  |
| Table S8 Selected bond lengths [Å] and angles [°] for complex <b>6<sub>Co</sub></b> .                                                           | 10 |
| Table S9 SHAPE analyses for <b>1<sub>Mn</sub>-6<sub>Co</sub></b> .                                                                              | 12 |
| Figure S1 X-ray powder diffraction patterns of <b>NIT-2-TrzPm</b> radical and complexes <b>1<sub>Mn</sub>-6<sub>Co</sub></b> .                  | 13 |
| Figure S2 Infrared spectrum of <b>NIT-2-TrzPm</b> radical at room temperature.                                                                  | 13 |
| Figure S3 Infrared spectrum of complex <b>1<sub>Mn</sub></b> at room temperature.                                                               | 13 |
| Figure S4 Infrared spectrum of complex <b>2<sub>Co</sub></b> at room temperature.                                                               | 14 |
| Figure S5 Infrared spectrum of complex <b>3<sub>Mn</sub></b> at room temperature.                                                               | 14 |
| Figure S6 Infrared spectrum of complex <b>4<sub>Co</sub></b> at room temperature.                                                               | 14 |
| Figure S7 Infrared spectrum of complex <b>5<sub>Mn</sub></b> at room temperature.                                                               | 15 |
| Figure S8 Infrared spectrum of complex <b>6<sub>Co</sub></b> at room temperature.                                                               | 15 |
| 2. The synthesis of <b>NIT-2-TrzPm</b> radical                                                                                                  | 15 |
| Scheme S1 The synthesis of <b>NIT-2-TrzPm</b> radical.                                                                                          | 15 |
| Figure S9 Packing diagram of <b>1<sub>Mn</sub></b> and <b>2<sub>Co</sub></b> (H, F, and CH <sub>2</sub> Cl <sub>2</sub> molecules are omitted). | 16 |
| Figure S10 Packing diagram of <b>3<sub>Mn</sub></b> and <b>4<sub>Co</sub></b> (H and F are omitted).                                            | 16 |
| Figure S11 Packing diagram of <b>5<sub>Mn</sub></b> (H, ClO <sub>4</sub> <sup>-</sup> and methanol solvent molecules are omitted).              | 16 |

|                                                                                                                                                                                            |    |
|--------------------------------------------------------------------------------------------------------------------------------------------------------------------------------------------|----|
| .....                                                                                                                                                                                      | 16 |
| Figure S12 Packing diagram of <b>6C<sub>0</sub></b> (H, ClO <sub>4</sub> <sup>-</sup> and methanol solvent molecules are omitted).                                                         | 16 |
| .....                                                                                                                                                                                      | 16 |
| 3. Magnetic Properties.....                                                                                                                                                                | 17 |
| Figure S13 Temperature-dependent dc magnetic susceptibility data measured at 1 kOe (left) and field-dependent magnetizations at 2 K (right) of <b>NIT-2-TrzPm</b> radical. ....            | 17 |
| Figure S14 The field-dependent magnetization curve of <b>NIT-2-TrzPm</b> radical at 2 K. The solid line represents the calculated Brillion curve for an isolated $S = 1/2$ .....           | 17 |
| Figure S15 The reduced magnetization data of <b>2C<sub>0</sub></b> and <b>4C<sub>0</sub></b> collected under various applied DC fields. ....                                               | 17 |
| Figure S16 Frequency-dependent ac signals for <b>2C<sub>0</sub></b> , <b>3M<sub>n</sub></b> , <b>4C<sub>0</sub></b> and <b>6C<sub>0</sub></b> at 2 K under a 0 or 1 kOe dc field.....      | 18 |
| Table S10 Relaxation fitting parameters from the least-square fitting of the Cole-Cole plots of <b>4C<sub>0</sub></b> under a 1 kOe dc field according to the generalized Debye model..... | 18 |
| Figure S17 The reduced magnetization data of <b>3M<sub>n</sub></b> collected under various applied DC fields. ....                                                                         | 18 |
| .....                                                                                                                                                                                      | 18 |
| Figure S18 Temperature- and frequency-dependent ac magnetic susceptibility data obtained for complex <b>3M<sub>n</sub></b> in a 1000 and 2000 Oe dc field. ....                            | 19 |

## 1. X-ray crystallography and powder x-ray diffraction

**Table S1** Crystallographic data and structure refinement parameters for **NIT-2-TrzPm** radical.

| Complex                                                                                                | <b>NIT-2-TrzPm</b>                                            |
|--------------------------------------------------------------------------------------------------------|---------------------------------------------------------------|
| Formula                                                                                                | C <sub>12</sub> H <sub>15</sub> N <sub>6</sub> O <sub>2</sub> |
| Formula weight                                                                                         | 275.30                                                        |
| <i>T</i> /K                                                                                            | 193                                                           |
| Crystal system                                                                                         | Monoclinic                                                    |
| Space group                                                                                            | <i>P</i> 2 <sub>1</sub> / <i>n</i>                            |
| <i>a</i> /Å                                                                                            | 6.4642(15)                                                    |
| <i>b</i> /Å                                                                                            | 10.078(2)                                                     |
| <i>c</i> /Å                                                                                            | 20.367(4)                                                     |
| <i>α</i> /°                                                                                            | 90                                                            |
| <i>β</i> /°                                                                                            | 95.559(7)                                                     |
| <i>γ</i> /°                                                                                            | 90                                                            |
| <i>V</i> /Å <sup>3</sup>                                                                               | 1320.6(5)                                                     |
| <i>Z</i>                                                                                               | 4                                                             |
| <i>F</i> (000)                                                                                         | 580.0                                                         |
| Collected refl.                                                                                        | 9125                                                          |
| Unique refl.                                                                                           | 2401                                                          |
| <i>R</i> <sub>int</sub>                                                                                | 0.0670                                                        |
| GOF                                                                                                    | 1.103                                                         |
| <i>R</i> <sub>1</sub> <sup>a</sup> , w <i>R</i> <sub>2</sub> <sup>b</sup> ( <i>I</i> > 2σ( <i>I</i> )) | 0.0510, 0.1084                                                |

|                        |                |
|------------------------|----------------|
| $R_1, wR_2$ (all data) | 0.0742, 0.1193 |
|------------------------|----------------|

$${}^a R_1 = \frac{\sum |F_o| - |F_c|}{\sum |F_o|}, {}^b wR_2 = \left\{ \frac{\sum [w(F_o^2 - F_c^2)^2]}{\sum [w(F_o^2)]} \right\}^{1/2}.$$

**Table S2** Selected bond lengths [Å] and angles [°] for **NIT-2-TrzPm** radical.

|                     |            |                        |          |
|---------------------|------------|------------------------|----------|
| N(4)-N(3)           | 1.359(3)   | N(6)-C(9)              | 1.348(3) |
| N(4)-C(9)           | 1.377(3)   | N(6)-C(10)             | 1.319(3) |
| N(4)-C(12)          | 1.358(3)   | N(3)-C(8)              | 1.330(3) |
| O(1)-N(1)           | 1.272(2)   | C(8)-C(7)              | 1.454(3) |
| O(2)-N(2)           | 1.279(2)   | C(11)-C(12)            | 1.350(3) |
| N(1)-C(7)           | 1.347(3)   | C(11)-C(10)            | 1.412(4) |
| N(5)-C(9)           | 1.332(3)   | N(5)-C(8)              | 1.352(3) |
| N(2)-C(7)           | 1.338(3)   | N(1)-C(7)-C(8)         | 123.8(2) |
| N(3)-N(4)-C(9)      | 110.08(19) | N(2)-C(7)-N(1)         | 109.8(2) |
| C(12)-N(4)-N(3)     | 127.1(2)   | N(2)-C(7)-C(8)         | 126.4(2) |
| C(12)-N(4)-C(9)     | 122.8(2)   | C(12)-C(11)-C(10)      | 119.3(2) |
| O(1)-N(1)-C(7)      | 125.7(2)   | C(11)-C(12)-N(4)       | 116.0(2) |
| C(9)-N(5)-C(8)      | 102.02(19) | N(6)-C(10)-C(11)       | 125.0(2) |
| O(2)-N(2)-C(7)      | 125.9(2)   | C(9)-N(6)-C(10)-C(11)  | 0.4(4)   |
| C(10)-N(6)-C(9)     | 114.8(2)   | C(8)-N(5)-C(9)-N(4)    | 0.2(2)   |
| C(8)-N(3)-N(4)      | 101.00(19) | C(8)-N(5)-C(9)-N(6)    | 179.4(2) |
| N(5)-C(9)-N(4)      | 109.57(19) | C(12)-N(4)-C(9)-N(5)   | 177.6(2) |
| N(5)-C(9)-N(6)      | 128.3(2)   | C(12)-N(4)-C(9)-N(6)   | 1.6(3)   |
| N(6)-C(9)-N(4)      | 122.2(2)   | C(12)-C(11)-C(10)-N(6) | 0.0(4)   |
| N(5)-C(8)-C(7)      | 121.4(2)   | C(10)-N(6)-C(9)-N(4)   | 1.2(3)   |
| N(3)-C(8)-N(5)      | 117.3(2)   | C(10)-N(6)-C(9)-N(5)   | 177.9(2) |
| N(3)-C(8)-C(7)      | 121.2(2)   | C(10)-C(11)-C(12)-N(4) | 0.3(3)   |
| N(4)-N(3)-C(8)-N(5) | 0.4(3)     | O(1)-N(1)-C(7)-N(2)    | 178.2(2) |
| N(4)-N(3)-C(8)-C(7) | 177.0(2)   | C(9)-N(4)-C(12)-C(11)  | 1.1(3)   |
| O(1)-N(1)-C(7)-C(8) | 1.7(4)     | C(9)-N(5)-C(8)-N(3)    | 0.1(3)   |
| O(2)-N(2)-C(7)-N(1) | 179.2(2)   | C(9)-N(5)-C(8)-C(7)    | 177.3(2) |
| O(2)-N(2)-C(7)-C(8) | 0.9(4)     | N(3)-N(4)-C(12)-C(11)  | 178.8(2) |
| N(5)-C(8)-C(7)-N(1) | 50.6(3)    | N(3)-C(8)-C(7)-N(1)    | 126.7(3) |
| N(5)-C(8)-C(7)-N(2) | 129.6(3)   | N(3)-C(8)-C(7)-N(2)    | 53.1(3)  |
| N(3)-N(4)-C(9)-N(5) | 0.4(3)     | C(9)-N(4)-N(3)-C(8)    | 0.5(2)   |
| N(3)-N(4)-C(9)-N(6) | 179.7(2)   |                        |          |

**Table S3** Selected bond lengths [Å] and angles [°] for complex **1Mn**.

|        |          |       |          |
|--------|----------|-------|----------|
| Mn1-O4 | 2.138(2) | N5-C8 | 1.353(3) |
| Mn1-O3 | 2.135(2) | N3-C8 | 1.327(3) |
| Mn1-O5 | 2.152(2) | N1-C7 | 1.332(3) |
| Mn1-O6 | 2.140(2) | N2-C7 | 1.343(4) |
| Mn1-O1 | 2.174(2) | N6-C9 | 1.338(3) |
| Mn1-N5 | 2.231(2) | N5-C9 | 1.330(3) |

|              |            |              |            |
|--------------|------------|--------------|------------|
| O1-N1        | 1.299(3)   | N4-C9        | 1.371(3)   |
| O2-N2        | 1.263(3)   | N6-C9-N4     | 123.2(2)   |
| N4-N3        | 1.360(3)   | N5-C9-N4     | 108.4(2)   |
| O4-Mn1-O5    | 93.16(9)   | N5-C9-N6     | 128.4(2)   |
| O4-Mn1-O6    | 175.78(9)  | N5-C8-C7     | 121.6(2)   |
| O4-Mn1-O1    | 96.59(9)   | N3-C8-N5     | 116.5(2)   |
| O4-Mn1-N5    | 94.16(8)   | C8-N3-N4     | 100.9(2)   |
| O3-Mn1-O4    | 83.19(8)   | O1-N1-C7     | 126.4(2)   |
| O3-Mn1-O5    | 101.67(9)  | O2-N2-C7     | 126.5(2)   |
| O3-Mn1-O6    | 95.42(9)   | N3-C8-C7     | 121.9(2)   |
| O3-Mn1-O1    | 86.58(9)   | N1-C7-N2     | 110.1(2)   |
| O3-Mn1-N5    | 165.89(9)  | N2-C7-C8     | 125.4(2)   |
| O5-Mn1-O1    | 167.93(8)  | N1-O1-Mn1    | 120.15(17) |
| O5-Mn1-N5    | 92.29(8)   | N3-N4-C9     | 111.0(2)   |
| O6-Mn1-O5    | 83.21(9)   | C9-N5-Mn1    | 131.56(17) |
| O6-Mn1-O1    | 87.28(9)   | C9-N5-C8     | 103.2(2)   |
| O6-Mn1-N5    | 88.15(8)   | C8-N5-Mn1    | 125.05(17) |
| O1-Mn1-N5    | 79.95(8)   | N1-C7-C8     | 124.4(2)   |
| N4-N3-C8-C7  | 179.6(2)   | N4-N3-C8-N5  | 0.2(3)     |
| N3-C8-C7-N1  | 157.5(3)   | N3-C8-C7-N2  | 23.3(4)    |
| Mn1-N5-C9-N4 | 175.57(17) | Mn1-O1-N1-C7 | 44.2(4)    |
| Mn1-N5-C9-N6 | 4.1(4)     | C9-N4-N3-C8  | 0.0(3)     |
| Mn1-N5-C8-N3 | 176.01(18) | C9-N5-C8-N3  | 0.3(3)     |
| Mn1-N5-C8-C7 | 3.8(4)     | C9-N5-C8-C7  | 179.5(3)   |
| O1-N1-C7-N2  | 178.5(3)   | C8-N5-C9-N4  | 0.3(3)     |
| O1-N1-C7-C8  | 0.8(5)     | C8-N5-C9-N6  | 179.4(3)   |
| O2-N2-C7-N1  | 176.8(3)   | N5-C8-C7-N1  | 22.7(4)    |
| O2-N2-C7-C8  | 2.5(5)     | N5-C8-C7-N2  | 156.4(3)   |
| N3-N4-C9-N5  | 0.2(3)     |              |            |

**Table S4** Selected bond lengths [ $\text{\AA}$ ] and angles [ $^\circ$ ] for complex **2co**.

|        |          |              |            |
|--------|----------|--------------|------------|
| Co1-O6 | 2.049(2) | C7-C8        | 1.452(4)   |
| Co1-O3 | 2.055(2) | C9-N4-N3-C8  | 0.4(3)     |
| Co1-O5 | 2.071(2) | N1-C7-C8-N3  | 154.1(3)   |
| Co1-O1 | 2.093(2) | C9-N5-C8-N3  | 0.4(3)     |
| Co1-O4 | 2.066(2) | C9-N5-C8-C7  | 179.5(3)   |
| Co1-N5 | 2.103(2) | Co1-O1-N1-C7 | 42.4(4)    |
| O1-N1  | 1.295(3) | Co1-N5-C9-N4 | 178.85(19) |
| O2-N2  | 1.264(3) | Co1-N5-C9-N6 | 1.3(5)     |
| N5-C9  | 1.328(4) | Co1-N5-C8-N3 | 179.33(19) |
| N5-C8  | 1.355(4) | Co1-N5-C8-C7 | 1.6(4)     |
| N4-N3  | 1.361(3) | C8-N5-C9-N4  | 0.1(3)     |

|           |            |             |          |
|-----------|------------|-------------|----------|
| N4-C9     | 1.370(4)   | C8-N5-C9-N6 | 179.9(3) |
| N3-C8     | 1.324(4)   | O1-N1-C7-N2 | 177.1(3) |
| N6-C9     | 1.343(4)   | O1-N1-C7-C8 | 1.7(5)   |
| N2-C7     | 1.345(4)   | O2-N2-C7-N1 | 177.1(3) |
| N1-C7     | 1.336(4)   | O2-N2-C7-C8 | 1.7(5)   |
| O6-Co1-O3 | 92.76(9)   | N4-N3-C8-N5 | 0.5(3)   |
| O6-Co1-O5 | 87.79(9)   | N4-N3-C8-C7 | 179.6(3) |
| O6-Co1-O1 | 87.26(9)   | N3-N4-C9-N5 | 0.2(3)   |
| O6-Co1-O4 | 178.92(9)  | N3-N4-C9-N6 | 179.6(3) |
| O6-Co1-N5 | 88.78(9)   | N2-C7-C8-N5 | 153.8(3) |
| O3-Co1-O5 | 95.84(9)   | N2-C7-C8-N3 | 27.3(5)  |
| O3-Co1-O1 | 87.01(9)   | C7-N2-C6    | 111.9(2) |
| O3-Co1-O4 | 87.03(9)   | O1-N1-C7    | 126.3(2) |
| O3-Co1-N5 | 171.36(9)  | N5-C9-N4    | 108.3(2) |
| O5-Co1-O1 | 174.39(8)  | N5-C9-N6    | 128.4(3) |
| O5-Co1-N5 | 92.71(9)   | N6-C9-N4    | 123.2(3) |
| O1-Co1-N5 | 84.57(9)   | N2-C7-C8    | 125.7(3) |
| O4-Co1-O5 | 91.18(9)   | N1-C7-N2    | 110.2(2) |
| O4-Co1-O1 | 93.79(9)   | N1-C7-C8    | 124.1(3) |
| O4-Co1-N5 | 91.58(9)   | N5-C8-C7    | 121.5(2) |
| N1-O1-Co1 | 117.44(17) | N3-C8-N5    | 116.5(2) |
| C9-N5-Co1 | 133.38(19) | N3-C8-C7    | 122.0(2) |
| C9-N5-C8  | 103.2(2)   | N1-C7-C8-N5 | 24.9(4)  |
| C8-N5-Co1 | 123.36(18) | O2-N2-C7    | 126.0(2) |
| N3-N4-C9  | 111.1(2)   | O2-N2-C6    | 121.9(2) |
| C8-N3-N4  | 100.8(2)   |             |          |

**Table S5** Selected bond lengths [ $\text{\AA}$ ] and angles [ $^\circ$ ] for complex **3<sub>Mn</sub>**.

|             |            |                      |          |
|-------------|------------|----------------------|----------|
| Mn(1)-O(3)  | 2.1288(18) | O(2)-N(2)            | 1.291(2) |
| Mn(1)-O(4)  | 2.1312(18) | N(6)-C(10)           | 1.321(3) |
| Mn(1)-O(5)  | 2.1227(18) | N(6)-C(9)            | 1.338(3) |
| Mn(1)-O(6)  | 2.1090(19) | N(4)-N(3)            | 1.358(3) |
| Mn(1)-O(1)  | 2.2010(18) | N(4)-C(9)            | 1.371(3) |
| Mn(1)-N(5)  | 2.2968(19) | N(4)-C(12)           | 1.361(3) |
| Mn(2)-O(7)  | 2.1451(17) | N(3)-C(8)            | 1.333(3) |
| Mn(2)-O(8)  | 2.106(2)   | N(5)-C(9)            | 1.333(3) |
| Mn(2)-O(9)  | 2.149(2)   | N(5)-C(8)            | 1.338(3) |
| Mn(2)-O(2)  | 2.1684(18) | N(1)-C(7)            | 1.339(3) |
| Mn(2)-O(10) | 2.1326(17) | N(5)-C(8)-C(7)-N(1)  | 24.7(3)  |
| Mn(2)-N(3)  | 2.286(2)   | C(10)-N(6)-C(9)-N(4) | 0.2(4)   |
| N(2)-C(7)   | 1.330(3)   | C(9)-N(5)-C(8)-N(3)  | 0.0(3)   |
| C(11)-C(10) | 1.410(4)   | C(12)-N(4)-C(9)-N(6) | 0.2(4)   |

|                  |            |                        |            |
|------------------|------------|------------------------|------------|
| C(11)-C(12)      | 1.352(4)   | C(12)-N(4)-C(9)-N(5)   | 179.7(2)   |
| C(8)-C(7)        | 1.451(3)   | N(4)-N(3)-C(8)-N(5)    | 0.3(2)     |
| O(1)-N(1)        | 1.281(3)   | N(4)-N(3)-C(8)-C(7)    | 178.47(19) |
| O(3)-Mn(1)-O(4)  | 84.14(7)   | N(3)-N(4)-C(9)-N(6)    | 179.3(2)   |
| O(3)-Mn(1)-O(1)  | 84.58(7)   | N(3)-N(4)-C(9)-N(5)    | 0.5(3)     |
| O(3)-Mn(1)-N(5)  | 84.75(7)   | N(3)-N(4)-C(12)-C(11)  | 179.0(2)   |
| O(4)-Mn(1)-O(1)  | 166.74(7)  | N(3)-C(8)-C(7)-N(1)    | 154.0(2)   |
| O(4)-Mn(1)-N(5)  | 93.45(7)   | N(3)-C(8)-C(7)-N(2)    | 25.6(3)    |
| O(5)-Mn(1)-O(3)  | 174.95(7)  | Mn(1)-O(1)-N(1)-C(7)   | 48.7(3)    |
| O(5)-Mn(1)-O(4)  | 93.93(8)   | N(5)-C(8)-C(7)-N(2)    | 155.7(2)   |
| O(5)-Mn(1)-O(1)  | 96.72(8)   | Mn(1)-N(5)-C(9)-N(6)   | 2.2(4)     |
| O(5)-Mn(1)-N(5)  | 90.72(7)   | Mn(1)-N(5)-C(9)-N(4)   | 178.03(15) |
| O(6)-Mn(1)-O(3)  | 101.18(8)  | Mn(1)-N(5)-C(8)-N(3)   | 178.52(14) |
| O(6)-Mn(1)-O(4)  | 101.92(8)  | Mn(1)-N(5)-C(8)-C(7)   | 0.2(3)     |
| O(6)-Mn(1)-O(5)  | 83.78(7)   | C(10)-N(6)-C(9)-N(5)   | 179.6(3)   |
| O(6)-Mn(1)-O(1)  | 87.10(7)   | C(10)-C(11)-C(12)-N(4) | 0.0(4)     |
| O(6)-Mn(1)-N(5)  | 163.97(8)  | C(9)-N(6)-C(10)-C(11)  | 0.1(4)     |
| O(1)-Mn(1)-N(5)  | 78.58(7)   | C(9)-N(4)-N(3)-Mn(2)   | 175.04(15) |
| O(7)-Mn(2)-O(9)  | 82.69(8)   | C(9)-N(4)-N(3)-C(8)    | 0.5(2)     |
| O(7)-Mn(2)-O(2)  | 110.16(7)  | C(9)-N(4)-C(12)-C(11)  | 0.0(4)     |
| O(7)-Mn(2)-N(3)  | 83.51(7)   | Mn(2)-O(2)-N(2)-C(7)   | 46.1(3)    |
| O(8)-Mn(2)-O(7)  | 84.16(7)   | C(9)-N(5)-C(8)-C(7)    | 178.7(2)   |
| O(8)-Mn(2)-O(9)  | 94.03(8)   | C(12)-N(4)-N(3)-Mn(2)  | 4.0(3)     |
| O(8)-Mn(2)-O(2)  | 94.03(7)   | C(12)-N(4)-N(3)-C(8)   | 179.5(2)   |
| O(8)-Mn(2)-O(10) | 105.40(8)  | Mn(2)-N(3)-C(8)-N(5)   | 175.57(14) |
| O(8)-Mn(2)-N(3)  | 163.05(8)  | Mn(2)-N(3)-C(8)-C(7)   | 5.7(3)     |
| O(9)-Mn(2)-O(2)  | 165.47(7)  | C(12)-C(11)-C(10)-N(6) | 0.0(5)     |
| O(9)-Mn(2)-N(3)  | 95.89(8)   | C(8)-N(5)-C(9)-N(6)    | 179.5(2)   |
| O(2)-Mn(2)-N(3)  | 79.40(7)   | C(8)-N(5)-C(9)-N(4)    | 0.3(2)     |
| O(10)-Mn(2)-O(7) | 162.22(8)  | O(1)-N(1)-C(7)-N(2)    | 177.9(2)   |
| O(10)-Mn(2)-O(9) | 81.73(7)   | O(1)-N(1)-C(7)-C(8)    | 1.8(4)     |
| O(10)-Mn(2)-O(2) | 84.49(7)   | O(2)-N(2)-C(7)-N(1)    | 178.6(2)   |
| O(10)-Mn(2)-N(3) | 89.63(7)   | O(2)-N(2)-C(7)-C(8)    | 1.8(4)     |
| N(1)-O(1)-Mn(1)  | 120.35(13) | O(2)-N(2)-C(7)         | 125.29(19) |
| N(2)-O(2)-Mn(2)  | 122.27(14) | O(2)-N(2)-C(6)         | 121.75(19) |
| C(10)-N(6)-C(9)  | 115.2(2)   | C(7)-N(2)-C(6)         | 112.97(19) |
| N(3)-N(4)-C(9)   | 109.92(18) | C(12)-C(11)-C(10)      | 119.9(2)   |
| N(3)-N(4)-C(12)  | 127.9(2)   | N(6)-C(10)-C(11)       | 124.0(3)   |
| C(12)-N(4)-C(9)  | 122.2(2)   | N(6)-C(9)-N(4)         | 122.9(2)   |
| N(4)-N(3)-Mn(2)  | 131.84(14) | N(5)-C(9)-N(6)         | 128.3(2)   |
| C(8)-N(3)-Mn(2)  | 126.14(15) | N(5)-C(9)-N(4)         | 108.8(2)   |
| C(8)-N(3)-N(4)   | 101.87(18) | C(11)-C(12)-N(4)       | 115.8(2)   |
| C(9)-N(5)-Mn(1)  | 132.43(16) | N(3)-C(8)-N(5)         | 115.83(19) |

|                 |            |                |          |
|-----------------|------------|----------------|----------|
| C(9)-N(5)-C(8)  | 103.61(19) | N(3)-C(8)-C(7) | 120.9(2) |
| C(8)-N(5)-Mn(1) | 123.94(14) | N(5)-C(8)-C(7) | 123.2(2) |
| O(1)-N(1)-C(7)  | 125.73(19) | N(1)-C(7)-C(8) | 124.0(2) |
| N(2)-C(7)-C(8)  | 125.7(2)   | N(2)-C(7)-N(1) | 110.3(2) |

**Table S6** Selected bond lengths [Å] and angles [°] for complex **4co**.

|                  |            |                       |            |
|------------------|------------|-----------------------|------------|
| Co(1)-O(4)       | 2.0550(19) | N(6)-C(9)             | 1.338(3)   |
| Co(1)-O(3)       | 2.0236(18) | N(6)-C(10)            | 1.321(4)   |
| Co(1)-O(6)       | 2.0335(17) | N(4)-N(3)             | 1.362(3)   |
| Co(1)-O(5)       | 2.0479(19) | N(4)-C(9)             | 1.366(3)   |
| Co(1)-O(1)       | 2.1362(19) | N(4)-C(12)            | 1.363(3)   |
| Co(1)-N(5)       | 2.153(2)   | N(3)-C(8)             | 1.333(3)   |
| Co(2)-O(2)       | 2.1299(18) | N(5)-C(9)             | 1.341(3)   |
| Co(2)-O(10)      | 2.0427(18) | N(5)-C(8)             | 1.341(3)   |
| Co(2)-O(8)       | 2.062(2)   | N(1)-C(7)             | 1.335(3)   |
| Co(2)-O(7)       | 2.0398(18) | N(6)-C(9)-N(4)        | 123.2(2)   |
| Co(2)-O(9)       | 2.0393(19) | N(6)-C(9)-N(5)        | 127.9(2)   |
| Co(2)-N(3)       | 2.134(2)   | N(5)-C(9)-N(4)        | 108.8(2)   |
| N(2)-C(7)        | 1.337(3)   | N(6)-C(10)-C(11)      | 124.0(3)   |
| C(10)-C(11)      | 1.405(4)   | C(12)-C(11)-C(10)     | 120.3(3)   |
| C(11)-C(12)      | 1.354(4)   | C(11)-C(12)-N(4)      | 115.3(2)   |
| C(8)-C(7)        | 1.445(3)   | N(3)-C(8)-N(5)        | 115.7(2)   |
| O(1)-N(1)        | 1.285(3)   | N(3)-C(8)-C(7)        | 120.9(2)   |
| O(2)-N(2)        | 1.286(3)   | N(3)-C(8)-C(7)-N(2)   | 26.8(4)    |
| O(4)-Co(1)-O(1)  | 173.52(7)  | N(5)-C(8)-C(7)-N(2)   | 153.4(2)   |
| O(4)-Co(1)-N(5)  | 95.73(8)   | N(3)-C(8)-C(7)-N(1)   | 153.3(2)   |
| O(3)-Co(1)-O(4)  | 88.99(8)   | Co(1)-O(1)-N(1)-C(7)  | 45.6(3)    |
| O(3)-Co(1)-O(6)  | 175.64(8)  | N(5)-C(8)-C(7)-N(1)   | 26.4(4)    |
| O(3)-Co(1)-O(5)  | 96.11(8)   | Co(1)-N(5)-C(9)-N(6)  | 3.4(4)     |
| O(3)-Co(1)-O(1)  | 84.53(7)   | Co(1)-N(5)-C(9)-N(4)  | 176.96(16) |
| O(3)-Co(1)-N(5)  | 86.95(8)   | Co(1)-N(5)-C(8)-N(3)  | 177.47(15) |
| O(6)-Co(1)-O(4)  | 92.45(8)   | Co(1)-N(5)-C(8)-C(7)  | 2.3(3)     |
| O(6)-Co(1)-O(5)  | 87.87(8)   | Co(2)-O(2)-N(2)-C(7)  | 43.1(3)    |
| O(6)-Co(1)-O(1)  | 93.98(7)   | Co(2)-N(3)-C(8)-N(5)  | 173.38(15) |
| O(6)-Co(1)-N(5)  | 88.81(7)   | Co(2)-N(3)-C(8)-C(7)  | 6.9(3)     |
| O(5)-Co(1)-O(4)  | 94.56(8)   | C(9)-N(6)-C(10)-C(11) | 0.3(4)     |
| O(5)-Co(1)-O(1)  | 86.43(8)   | C(9)-N(4)-N(3)-Co(2)  | 172.61(16) |
| O(5)-Co(1)-N(5)  | 169.31(8)  | C(9)-N(4)-N(3)-C(8)   | 0.2(2)     |
| O(1)-Co(1)-N(5)  | 83.67(7)   | C(9)-N(4)-C(12)-C(11) | 0.3(4)     |
| O(2)-Co(2)-N(3)  | 83.17(7)   | C(9)-N(5)-C(8)-N(3)   | 0.3(3)     |
| O(10)-Co(2)-O(2) | 83.78(7)   | C(9)-N(5)-C(8)-C(7)   | 180.0(2)   |
| O(10)-Co(2)-O(8) | 86.51(8)   | C(10)-N(6)-C(9)-N(4)  | 1.0(4)     |

|                  |            |                        |            |
|------------------|------------|------------------------|------------|
| O(10)-Co(2)-N(3) | 91.27(8)   | C(10)-N(6)-C(9)-N(5)   | 178.6(2)   |
| O(8)-Co(2)-O(2)  | 170.21(7)  | C(10)-C(11)-C(12)-N(4) | 0.9(4)     |
| O(8)-Co(2)-N(3)  | 98.32(8)   | C(12)-N(4)-N(3)-Co(2)  | 5.9(4)     |
| O(7)-Co(2)-O(2)  | 105.22(8)  | C(12)-N(4)-N(3)-C(8)   | 178.7(2)   |
| O(7)-Co(2)-O(10) | 169.76(8)  | C(12)-N(4)-C(9)-N(6)   | 0.7(4)     |
| O(7)-Co(2)-O(8)  | 84.56(8)   | C(12)-N(4)-C(9)-N(5)   | 179.0(2)   |
| O(7)-Co(2)-N(3)  | 85.08(8)   | C(8)-N(5)-C(9)-N(6)    | 179.3(2)   |
| O(9)-Co(2)-O(2)  | 89.09(7)   | C(8)-N(5)-C(9)-N(4)    | 0.4(2)     |
| O(9)-Co(2)-O(10) | 96.56(8)   | O(1)-N(1)-C(7)-N(2)    | 179.1(2)   |
| O(9)-Co(2)-O(8)  | 90.79(8)   | O(1)-N(1)-C(7)-C(8)    | 1.1(4)     |
| O(9)-Co(2)-O(7)  | 88.58(8)   | O(2)-N(2)-C(7)-N(1)    | 178.9(2)   |
| O(9)-Co(2)-N(3)  | 168.34(8)  | O(2)-N(2)-C(7)-C(8)    | 1.0(4)     |
| N(5)-C(8)-C(7)   | 123.4(2)   | C(9)-N(5)-Co(1)        | 134.26(16) |
| N(1)-C(7)-N(2)   | 110.6(2)   | C(9)-N(5)-C(8)         | 103.49(19) |
| N(1)-C(7)-C(8)   | 124.4(2)   | C(8)-N(5)-Co(1)        | 122.20(15) |
| N(2)-C(7)-C(8)   | 125.0(2)   | O(1)-N(1)-C(7)         | 125.4(2)   |
| N(1)-O(1)-Co(1)  | 117.51(14) | O(2)-N(2)-C(7)         | 125.3(2)   |
| N(2)-O(2)-Co(2)  | 119.82(14) | N(6)-C(10)-C(11)-C(12) | 0.6(5)     |
| C(10)-N(6)-C(9)  | 115.0(2)   | N(4)-N(3)-C(8)-N(5)    | 0.1(3)     |
| N(3)-N(4)-C(9)   | 109.97(19) | N(4)-N(3)-C(8)-C(7)    | 179.8(2)   |
| N(3)-N(4)-C(12)  | 127.8(2)   | N(3)-N(4)-C(9)-N(6)    | 179.3(2)   |
| C(12)-N(4)-C(9)  | 122.3(2)   | N(3)-N(4)-C(9)-N(5)    | 0.4(3)     |
| N(4)-N(3)-Co(2)  | 131.40(15) | N(3)-N(4)-C(12)-C(11)  | 178.1(2)   |
| C(8)-N(3)-Co(2)  | 126.20(16) | C(8)-N(3)-N(4)         | 101.99(19) |

**Table S7** Selected bond lengths [Å] and angles [°] for complex **5<sub>Mn</sub>**.

|             |            |                |            |
|-------------|------------|----------------|------------|
| Mn(1)-O(1)  | 2.1280(16) | N(5)-C(9)      | 1.335(3)   |
| Mn(1)-O(4)  | 2.1920(16) | N(4)-C(9)      | 1.376(3)   |
| Mn(1)-O(3)  | 2.1353(17) | N(4)-C(12)     | 1.357(3)   |
| Mn(1)-O(5)  | 2.1216(16) | N(6)-C(9)      | 1.337(3)   |
| Mn(1)-N(11) | 2.2391(18) | N(6)-C(10)     | 1.321(3)   |
| Mn(1)-N(5)  | 2.2275(18) | C(7)-C(8)      | 1.449(3)   |
| O(2)-N(2)   | 1.263(2)   | C(10)-C(11)    | 1.414(3)   |
| O(1)-N(1)   | 1.296(2)   | C(11)-C(12)    | 1.357(3)   |
| O(5)-N(7)   | 1.289(2)   | C(22)-C(23)    | 1.415(3)   |
| O(6)-N(8)   | 1.265(2)   | C(23)-C(24)    | 1.354(3)   |
| N(10)-N(9)  | 1.363(3)   | C(20)-C(19)    | 1.449(3)   |
| N(10)-C(24) | 1.362(3)   | N(1)-C(7)-N(2) | 109.11(18) |
| N(10)-C(21) | 1.375(3)   | N(1)-C(7)-C(8) | 124.73(19) |
| N(9)-C(20)  | 1.326(3)   | N(2)-C(7)-C(8) | 126.14(18) |
| N(11)-C(21) | 1.335(3)   | N(3)-C(8)-N(5) | 116.22(19) |
| N(11)-C(20) | 1.361(3)   | N(3)-C(8)-C(7) | 121.55(19) |



|                   |            |                         |            |
|-------------------|------------|-------------------------|------------|
| N(12)-C(22)       | 1.326(3)   | N(5)-C(8)-C(7)          | 122.23(18) |
| N(12)-C(21)       | 1.336(3)   | N(5)-C(9)-N(4)          | 108.35(19) |
| N(8)-C(19)        | 1.354(3)   | N(5)-C(9)-N(6)          | 128.7(2)   |
| N(7)-C(19)        | 1.342(3)   | N(6)-C(9)-N(4)          | 122.96(19) |
| N(1)-C(7)         | 1.341(3)   | N(6)-C(10)-C(11)        | 124.5(2)   |
| N(2)-C(7)         | 1.351(3)   | C(12)-C(11)-C(10)       | 119.5(2)   |
| N(3)-N(4)         | 1.364(3)   | C(24)-C(23)-C(22)       | 119.5(2)   |
| N(3)-C(8)         | 1.329(3)   | C(23)-C(24)-N(10)       | 115.7(2)   |
| N(5)-C(8)         | 1.363(3)   | N(11)-C(21)-N(10)       | 108.49(18) |
| O(1)-Mn(1)-O(4)   | 89.45(6)   | N(11)-C(21)-N(12)       | 129.0(2)   |
| O(1)-Mn(1)-O(3)   | 95.32(7)   | N(12)-C(21)-N(10)       | 122.51(19) |
| O(1)-Mn(1)-N(11)  | 90.52(6)   | N(9)-C(20)-N(11)        | 116.39(19) |
| O(1)-Mn(1)-N(5)   | 81.92(6)   | N(9)-C(20)-C(19)        | 121.26(19) |
| O(4)-Mn(1)-N(11)  | 86.24(7)   | N(11)-C(20)-C(19)       | 122.29(18) |
| O(4)-Mn(1)-N(5)   | 90.52(6)   | N(8)-C(19)-C(20)        | 125.34(19) |
| O(3)-Mn(1)-O(4)   | 174.51(7)  | N(7)-C(19)-N(8)         | 109.06(19) |
| O(3)-Mn(1)-N(11)  | 96.40(7)   | C(8)-N(3)-N(4)-C(9)     | 0.4(2)     |
| O(3)-Mn(1)-N(5)   | 87.47(7)   | C(9)-N(5)-C(8)-N(3)     | 0.8(3)     |
| O(5)-Mn(1)-O(1)   | 170.86(6)  | C(9)-N(5)-C(8)-C(7)     | 179.8(2)   |
| O(5)-Mn(1)-O(4)   | 85.63(6)   | C(9)-N(4)-C(12)-C(11)   | 1.5(3)     |
| O(5)-Mn(1)-O(3)   | 90.00(7)   | C(9)-N(6)-C(10)-C(11)   | 0.4(4)     |
| O(5)-Mn(1)-N(11)  | 81.49(6)   | C(12)-N(4)-C(9)-N(5)    | 178.1(2)   |
| O(5)-Mn(1)-N(5)   | 105.78(6)  | C(12)-N(4)-C(9)-N(6)    | 1.6(3)     |
| N(5)-Mn(1)-N(11)  | 171.82(7)  | C(24)-N(10)-N(9)-C(20)  | 177.3(2)   |
| N(1)-O(1)-Mn(1)   | 123.46(12) | C(24)-N(10)-C(21)-N(11) | 178.2(2)   |
| C(11)-C(12)-N(4)  | 115.7(2)   | C(24)-N(10)-C(21)-N(12) | 1.3(3)     |
| N(12)-C(22)-C(23) | 124.3(2)   | C(21)-N(10)-N(9)-C(20)  | 1.2(2)     |
| N(7)-O(5)-Mn(1)   | 120.84(12) | C(21)-N(10)-C(24)-C(23) | 2.6(3)     |
| N(9)-N(10)-C(21)  | 110.87(17) | C(21)-N(11)-C(20)-N(9)  | 1.6(3)     |
| C(24)-N(10)-N(9)  | 126.43(19) | C(21)-N(11)-C(20)-C(19) | 175.6(2)   |
| C(24)-N(10)-C(21) | 122.69(19) | C(21)-N(12)-C(22)-C(23) | 1.0(4)     |
| C(20)-N(9)-N(10)  | 101.18(17) | C(20)-N(11)-C(21)-N(10) | 0.6(2)     |
| C(21)-N(11)-Mn(1) | 134.24(15) | C(20)-N(11)-C(21)-N(12) | 178.8(2)   |
| C(21)-N(11)-C(20) | 103.04(17) | Mn(1)-N(5)-C(9)-N(6)    | 4.3(3)     |
| C(20)-N(11)-Mn(1) | 121.84(14) | O(2)-N(2)-C(7)-N(1)     | 176.3(2)   |
| C(22)-N(12)-C(21) | 115.3(2)   | O(2)-N(2)-C(7)-C(8)     | 2.4(4)     |
| O(6)-N(8)-C(19)   | 126.33(19) | C(8)-N(3)-N(4)-C(12)    | 178.5(2)   |
| N(7)-C(19)-C(20)  | 125.42(19) | C(8)-N(5)-C(9)-N(4)     | 0.9(2)     |
| O(5)-N(7)-C(19)   | 126.91(18) | C(8)-N(5)-C(9)-N(6)     | 179.4(2)   |
| O(1)-N(1)-C(7)    | 126.49(18) | O(1)-N(1)-C(7)-N(2)     | 176.53(19) |
| O(2)-N(2)-C(7)    | 126.20(18) | O(1)-N(1)-C(7)-C(8)     | 4.8(3)     |
| C(8)-N(3)-N(4)    | 101.20(17) | O(5)-N(7)-C(19)-N(8)    | 177.3(2)   |
| C(8)-N(5)-Mn(1)   | 125.72(14) | O(5)-N(7)-C(19)-C(20)   | 2.0(4)     |

|                         |            |                         |          |
|-------------------------|------------|-------------------------|----------|
| C(9)-N(5)-Mn(1)         | 130.87(15) | C(10)-N(6)-C(9)-N(5)    | 179.1(2) |
| C(9)-N(5)-C(8)          | 103.23(17) | C(10)-N(6)-C(9)-N(4)    | 0.5(3)   |
| N(3)-N(4)-C(9)          | 110.99(17) | C(10)-C(11)-C(12)-N(4)  | 0.6(4)   |
| C(12)-N(4)-N(3)         | 126.58(19) | O(6)-N(8)-C(19)-N(7)    | 176.5(2) |
| C(12)-N(4)-C(9)         | 122.42(19) | O(6)-N(8)-C(19)-C(20)   | 8.2(4)   |
| C(10)-N(6)-C(9)         | 114.9(2)   | C(22)-N(12)-C(21)-N(10) | 0.6(3)   |
| Mn(1)-O(1)-N(1)-C(7)    | 42.5(3)    | C(22)-N(12)-C(21)-N(11) | 180.0(2) |
| Mn(1)-O(5)-N(7)-C(19)   | 39.6(3)    | C(22)-C(23)-C(24)-N(10) | 2.1(3)   |
| Mn(1)-N(11)-C(21)-N(10) | 168.31(15) | N(10)-N(9)-C(20)-N(11)  | 1.8(3)   |
| Mn(1)-N(11)-C(21)-N(12) | 12.3(4)    | N(10)-N(9)-C(20)-C(19)  | 175.4(2) |
| Mn(1)-N(11)-C(20)-N(9)  | 169.11(15) | N(9)-N(10)-C(24)-C(23)  | 179.0(2) |
| Mn(1)-N(11)-C(20)-C(19) | 13.8(3)    | N(9)-N(10)-C(21)-N(11)  | 0.4(3)   |
| Mn(1)-N(5)-C(8)-N(3)    | 176.21(14) | N(9)-N(10)-C(21)-N(12)  | 179.9(2) |
| Mn(1)-N(5)-C(8)-C(7)    | 4.8(3)     | N(9)-C(20)-C(19)-N(8)   | 12.8(3)  |
| Mn(1)-N(5)-C(9)-N(4)    | 176.04(14) | N(9)-C(20)-C(19)-N(7)   | 161.8(2) |
| N(2)-C(7)-C(8)-N(3)     | 20.7(3)    | N(11)-C(20)-C(19)-N(8)  | 170.2(2) |
| N(2)-C(7)-C(8)-N(5)     | 158.3(2)   | N(11)-C(20)-C(19)-N(7)  | 15.2(4)  |
| N(3)-N(4)-C(9)-N(5)     | 0.9(2)     | N(12)-C(22)-C(23)-C(24) | 0.3(4)   |
| N(3)-N(4)-C(9)-N(6)     | 179.5(2)   | N(1)-C(7)-C(8)-N(3)     | 160.9(2) |
| N(3)-N(4)-C(12)-C(11)   | 179.7(2)   | N(1)-C(7)-C(8)-N(5)     | 20.1(3)  |
| N(4)-N(3)-C(8)-N(5)     | 0.2(2)     | N(6)-C(10)-C(11)-C(12)  | 0.4(4)   |
| N(4)-N(3)-C(8)-C(7)     | 179.29(19) |                         |          |

**Table S8** Selected bond lengths [Å] and angles [°] for complex **6c<sub>o</sub>**.

|             |            |                  |            |
|-------------|------------|------------------|------------|
| Co(1)-O(1)  | 2.0072(15) | O(2)-N(2)        | 1.259(2)   |
| O(9)-N(7)   | 1.260(2)   | N(9)-C(23)       | 1.373(3)   |
| N(9)-N(8)   | 1.354(3)   | N(7)-C(21)       | 1.354(3)   |
| Co(1)-O(3)  | 2.1295(17) | N(2)-C(7)        | 1.350(3)   |
| N(9)-C(26)  | 1.356(3)   | N(6)-C(9)        | 1.333(3)   |
| Co(1)-N(5)  | 2.1054(16) | C(10)-C(11)      | 1.404(3)   |
| Co(2)-O(10) | 2.0425(15) | C(26)-C(25)      | 1.358(3)   |
| N(3)-C(8)   | 1.325(3)   | C(24)-C(25)      | 1.403(3)   |
| Co(2)-O(11) | 2.0787(17) | O(8)-C(14)       | 1.35(4)    |
| N(8)-C(22)  | 1.321(3)   | N(8)-N(9)-C(23)  | 111.04(17) |
| Co(2)-N(11) | 2.1465(17) | N(8)-N(9)-C(26)  | 126.11(18) |
| N(6)-C(10)  | 1.323(3)   | O(9)-N(7)-C(21)  | 126.82(19) |
| N(10)-C(23) | 1.337(3)   | C(8)-N(3)-N(4)   | 101.17(16) |
| N(10)-C(24) | 1.322(3)   | O(2)-N(2)-C(7)   | 126.42(19) |
| C(7)-C(8)   | 1.449(3)   | N(1)-C(7)-N(2)   | 108.87(18) |
| C(22)-C(21) | 1.443(3)   | N(5)-C(8)-C(7)   | 121.55(17) |
| C(12)-C(11) | 1.355(3)   | N(8)-C(22)-N(11) | 116.23(19) |
| C(17)-C(16) | 1.526(3)   | C(11)-C(12)-N(4) | 116.20(19) |

|                                  |            |                         |          |
|----------------------------------|------------|-------------------------|----------|
| O(10)-N(12)                      | 1.298(2)   | N(6)-C(10)-C(11)        | 124.7(2) |
| O(1)-N(1)                        | 1.288(2)   | N(9)-C(26)-C(25)        | 115.5(2) |
| N(1)-C(7)                        | 1.337(3)   | C(12)-C(11)-C(10)       | 119.1(2) |
| N(5)-C(8)                        | 1.357(3)   | N(10)-C(24)-C(25)       | 124.8(2) |
| N(5)-C(9)                        | 1.343(3)   | C(26)-C(25)-C(24)       | 119.5(2) |
| N(11)-C(22)                      | 1.366(3)   | N(6)-C(10)-C(11)-C(12)  | 0.7(4)   |
| N(11)-C(23)                      | 1.341(3)   | C(8)-N(5)-C(9)-N(4)     | 1.5(2)   |
| N(12)-C(21)                      | 1.330(3)   | C(8)-N(5)-C(9)-N(6)     | 176.8(2) |
| N(12)-C(17)                      | 1.504(3)   | C(9)-N(5)-C(8)-N(3)     | 1.5(3)   |
| N(4)-N(3)                        | 1.356(3)   | C(9)-N(5)-C(8)-C(7)     | 175.1(2) |
| N(4)-C(9)                        | 1.371(3)   | C(9)-N(4)-N(3)-C(8)     | 0.3(2)   |
| N(4)-C(12)                       | 1.360(3)   | C(9)-N(4)-C(12)-C(11)   | 0.0(3)   |
| O(1)-Co(1)-O(1 <sup>#1</sup> )   | 180.00(8)  | C(9)-N(6)-C(10)-C(11)   | 0.5(4)   |
| O(1 <sup>#1</sup> )-Co(1)-O(3)   | 89.23(7)   | C(22)-N(11)-C(23)-N(9)  | 0.7(2)   |
| C(26)-N(9)-C(23)                 | 122.85(19) | C(22)-N(11)-C(23)-N(10) | 179.2(2) |
| O(1)-Co(1)-O(3)                  | 90.77(7)   | C(23)-N(11)-C(22)-N(8)  | 0.3(3)   |
| O(1 <sup>#1</sup> )-Co(1)-N(5)   | 93.42(6)   | C(23)-N(11)-C(22)-C(21) | 178.8(2) |
| O(1)-Co(1)-N(5)                  | 86.58(6)   | C(12)-N(4)-N(3)-C(8)    | 177.6(2) |
| O(3 <sup>#1</sup> )-Co(1)-O3     | 180.0      | C(12)-N(4)-C(9)-N(5)    | 178.6(2) |
| C(22)-N(8)-N(9)                  | 101.66(17) | C(12)-N(4)-C(9)-N(6)    | 0.2(3)   |
| C(10)-N(6)-C(9)                  | 114.93(19) | C(17)-N(12)-C(21)-N(7)  | 8.9(3)   |
| C(24)-N(10)-C(23)                | 114.91(19) | C(17)-N(12)-C(21)-C(22) | 171.0(2) |
| N(5)-Co(1)-O(3 <sup>#1</sup> )   | 93.43(7)   | C(26)-N(9)-C(23)-N(11)  | 178.7(2) |
| N(5)-Co(1)-O(3)                  | 86.57(7)   | C(26)-N(9)-C(23)-N(10)  | 1.4(4)   |
| N(5 <sup>#1</sup> )-Co(1)-N5     | 180.0      | C(24)-N(10)-C(23)-N(11) | 179.1(2) |
| N(1)-C(7)-C(8)                   | 125.42(18) | C(24)-N(10)-C(23)-N(9)  | 0.8(3)   |
| N(2)-C(7)-C(8)                   | 125.61(18) | N(4)-N(3)-C(8)-N(5)     | 0.8(3)   |
| O(10)-Co(2)-O(10 <sup>#2</sup> ) | 180.0      | N(4)-N(3)-C(8)-C(7)     | 175.8(2) |
| O(10)-Co(2)-O(11)                | 90.55(7)   | N(4)-C(12)-C(11)-C(10)  | 0.4(4)   |
| O(10 <sup>#2</sup> )-Co(2)-O11   | 89.45(7)   | O(2)-N(2)-C(7)-N(1)     | 176.2(2) |
| O(10 <sup>#2</sup> )-Co(2)-N(11) | 93.96(6)   | O(2)-N(2)-C(7)-C(8)     | 7.3(4)   |
| N(3)-C(8)-N(5)                   | 116.41(18) | O(9)-N(7)-C(21)-N(12)   | 176.0(2) |
| N(3)-C(8)-C(7)                   | 121.94(18) | O(9)-N(7)-C(21)-C(22)   | 3.9(4)   |
| N(5)-C(9)-N(4)                   | 107.93(18) | C(10)-N(6)-C(9)-N(5)    | 178.0(2) |
| N(6)-C(9)-N(5)                   | 129.00(19) | C(10)-N(6)-C(9)-N(4)    | 0.0(3)   |
| N(6)-C(9)-N(4)                   | 123.05(18) | C(26)-N(9)-N(8)-C(22)   | 178.9(2) |
| N(11)-C(22)-C(21)                | 122.36(18) | N(9)-N(8)-C(22)-N(11)   | 0.2(3)   |
| O(10)-Co(2)-N(11)                | 86.04(6)   | N(9)-N(8)-C(22)-C(21)   | 179.3(2) |
| O(11)-Co(2)-O(11 <sup>#2</sup> ) | 180.0      | N(9)-C(26)-C(25)-C(24)  | 1.3(4)   |
| O(11 <sup>#2</sup> )-Co(2)-N(11) | 85.86(7)   | N(3)-N(4)-C(9)-N(5)     | 1.2(3)   |
| N(11 <sup>#2</sup> )-Co(2)-N(11) | 180.00(9)  | N(3)-N(4)-C(9)-N(6)     | 177.2(2) |
| O(11)-Co(2)-N(11 <sup>#2</sup> ) | 85.86(7)   | N(3)-N(4)-C(12)-C(11)   | 177.0(2) |
| O(11)-Co(2)-N(11)                | 94.14(7)   | N(2)-C(7)-C(8)-N(5)     | 173.4(2) |

|                         |            |                         |            |
|-------------------------|------------|-------------------------|------------|
| N(8)-C(22)-C(21)        | 121.40(19) | N(2)-C(7)-C(8)-N(3)     | 10.2(3)    |
| N(11)-C(23)-N(9)        | 108.37(18) | N(8)-N(9)-C(23)-N(11)   | 0.9(3)     |
| N(10)-C(23)-N(11)       | 129.18(19) | N(8)-N(9)-C(23)-N(10)   | 179.1(2)   |
| N(10)-C(23)-N(9)        | 122.46(19) | N(8)-N(9)-C(26)-C(25)   | 178.1(2)   |
| O(11)-Co(2)-N(11)       | 94.14(7)   | N(8)-C(22)-C(21)-N(12)  | 163.0(2)   |
| N(12)-C(21)-N(7)        | 109.24(18) | N(8)-C(22)-C(21)-N(7)   | 17.1(4)    |
| N(12)-C(21)-C(22)       | 125.41(19) | Co(2)-N(11)-C(23)-N(9)  | 177.91(15) |
| N(7)-C(21)-C(22)        | 125.36(19) | Co(2)-N(11)-C(23)-N(10) | 2.2(4)     |
| N(12)-C(17)-C(16)       | 106.46(18) | O(10)-N(12)-C(21)-N(7)  | 175.9(2)   |
| N(12)-O(10)-Co(2)       | 122.13(13) | O(10)-N(12)-C(21)-C(22) | 4.2(4)     |
| N(1)-O(1)-Co(1)         | 122.17(13) | O(10)-N(12)-C(17)-C(20) | 161.25(19) |
| O(1)-N(1)-C(7)          | 127.35(18) | O(10)-N(12)-C(17)-C(16) | 80.1(2)    |
| C(8)-N(5)-Co(1)         | 122.88(14) | O(10)-N(12)-C(17)-C(15) | 39.6(3)    |
| C(9)-N(5)-Co(1)         | 133.53(15) | O(1)-N(1)-C(7)-N(2)     | 177.0(2)   |
| C(9)-N(5)-C(8)          | 103.03(16) | O(1)-N(1)-C(7)-C(8)     | 0.5(4)     |
| C(22)-N(11)-Co(2)       | 123.51(14) | C(23)-N(9)-N(8)-C(22)   | 0.6(2)     |
| C(23)-N(11)-Co(2)       | 133.78(14) | C(23)-N(9)-C(26)-C(25)  | 2.4(4)     |
| C(23)-N(11)-C(22)       | 102.70(17) | C(23)-N(10)-C(24)-C(25) | 2.0(4)     |
| O(10)-N(12)-C(21)       | 126.73(18) | N(1)-C(7)-C(8)-N(5)     | 10.6(3)    |
| O(10)-N(12)-C(17)       | 121.32(17) | N(1)-C(7)-C(8)-N(3)     | 165.7(2)   |
| C(21)-N(12)-C(17)       | 111.78(17) | N(11)-C(22)-C(21)-N(12) | 18.0(4)    |
| N(3)-N(4)-C(9)          | 111.43(16) | N(11)-C(22)-C(21)-N(7)  | 161.9(2)   |
| N(3)-N(4)-C(12)         | 126.52(18) | C(21)-N(12)-C(17)-C(16) | 95.4(2)    |
| C(12)-N(4)-C(9)         | 121.99(19) | Co(1)-N(5)-C(9)-N(4)    | 169.78(15) |
| Co(1)-O(1)-N(1)-C(7)    | 32.4(3)    | Co(1)-N(5)-C(9)-N(6)    | 11.9(4)    |
| N(10)-C(24)-C(25)-C(26) | 1.0(4)     | Co(2)-O(10)-N(12)-C(21) | 39.1(3)    |
| Co(1)-N(5)-C(8)-N(3)    | 170.99(15) | Co(2)-O(10)-N(12)-C(17) | 135.74(17) |
| Co(1)-N(5)-C(8)-C(7)    | 12.5(3)    | Co(2)-N(11)-C(22)-N(8)  | 178.47(15) |
| Co(2)-N(11)-C(22)-C(21) | 2.5(3)     |                         |            |

Symmetry transformations used to generate equivalent atoms: <sup>#1</sup> -X,1-Y,1-Z; <sup>#2</sup> 1-X,1-Y,1-Z

**Table S9** SHAPE analyses for **1<sub>Mn</sub>-6<sub>Co</sub>**.

| Complexes<br>Label | <b>1<sub>Mn</sub></b> | <b>2<sub>Co</sub></b> | <b>3<sub>Mn</sub></b> |              | <b>4<sub>Co</sub></b> |              | <b>5<sub>Mn</sub></b> | <b>6<sub>Co</sub></b> |              |
|--------------------|-----------------------|-----------------------|-----------------------|--------------|-----------------------|--------------|-----------------------|-----------------------|--------------|
|                    |                       |                       | <b>Mn1</b>            | <b>Mn2</b>   | <b>Co1</b>            | <b>Co2</b>   |                       | <b>Co1</b>            | <b>Co2</b>   |
| OC-6               | <b>0.890</b>          | <b>0.243</b>          | <b>1.014</b>          | <b>2.162</b> | <b>0.369</b>          | <b>1.094</b> | <b>0.803</b>          | <b>0.185</b>          | <b>0.211</b> |
| TPR-6              | 12.295                | 14.374                | 12.486                | 8.970        | 13.271                | 10.615       | 13.037                | 16.170                | 15.891       |
| JPPY-6             | 28.081                | 30.625                | 27.426                | 25.240       | 30.448                | 26.722       | 27.992                | 31.687                | 32.029       |

| Code | Label  | Symmetry              | Shape                         |
|------|--------|-----------------------|-------------------------------|
| 1    | OC-6   | <i>O<sub>h</sub></i>  | Octahedron                    |
| 2    | TPR-6  | <i>D<sub>3h</sub></i> | Trigonal prism                |
| 3    | JPPY-6 | <i>C<sub>5v</sub></i> | Johnson pentagonal pyramid J2 |

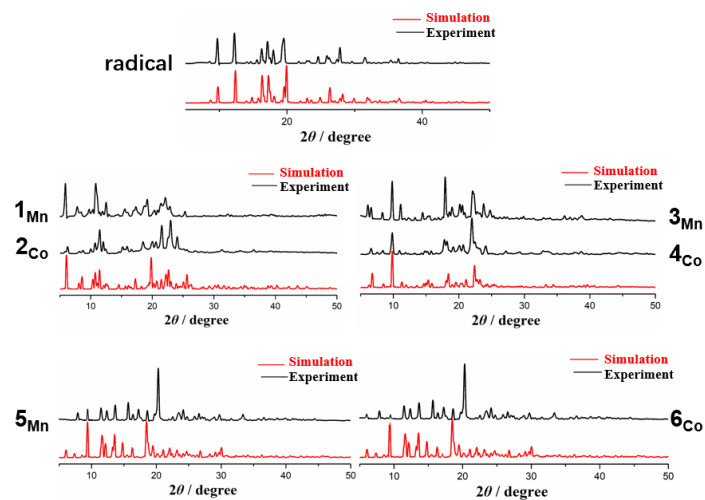

**Figure S1** X-ray powder diffraction patterns of NIT-2-TrzPm radical and complexes **1<sub>Mn</sub>**-**6<sub>Co</sub>**.

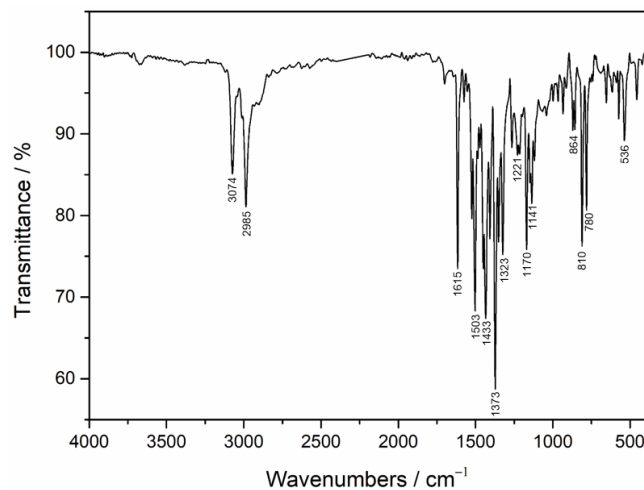

**Figure S2** Infrared spectrum of NIT-2-TrzPm radical at room temperature.

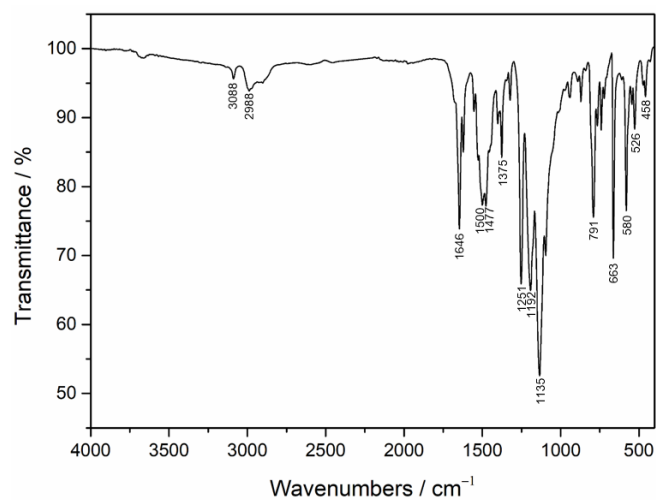

**Figure S3** Infrared spectrum of complex **1<sub>Mn</sub>** at room temperature.

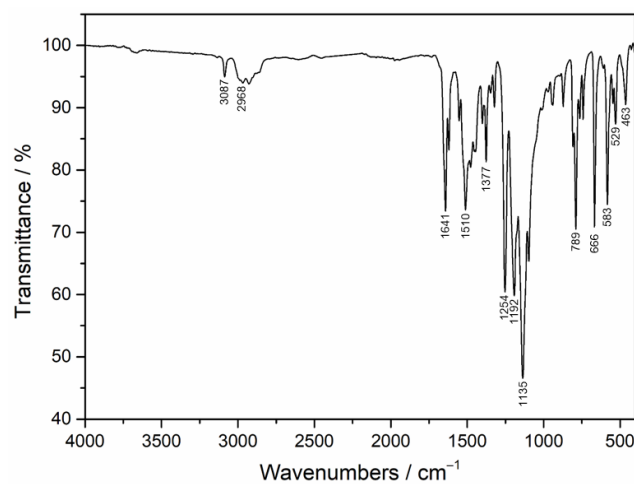

**Figure S4** Infrared spectrum of complex **2<sub>Co</sub>** at room temperature.

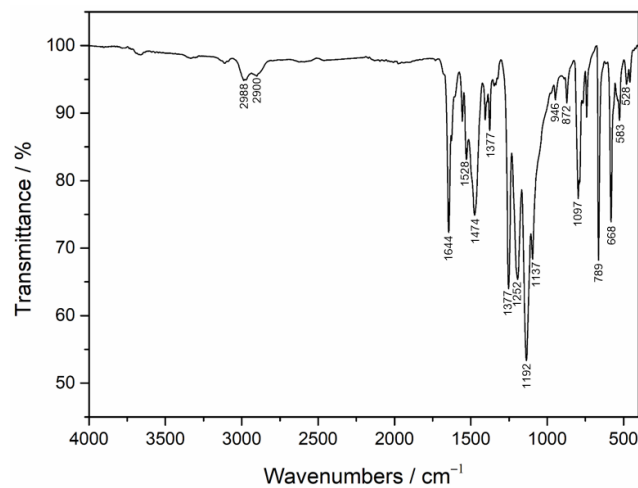

**Figure S5** Infrared spectrum of complex **3<sub>Mn</sub>** at room temperature.

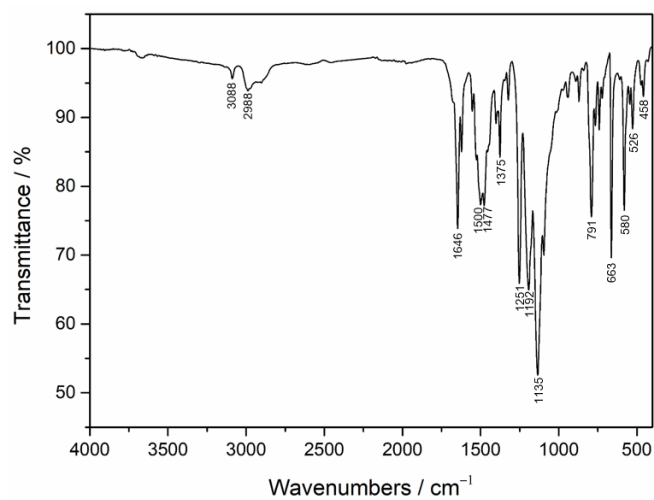

**Figure S6** Infrared spectrum of complex **4<sub>Co</sub>** at room temperature.

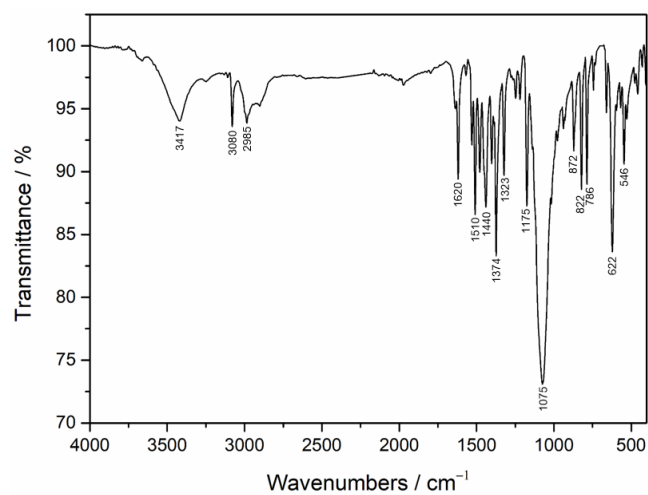

**Figure S7** Infrared spectrum of complex **5<sub>Mn</sub>** at room temperature.

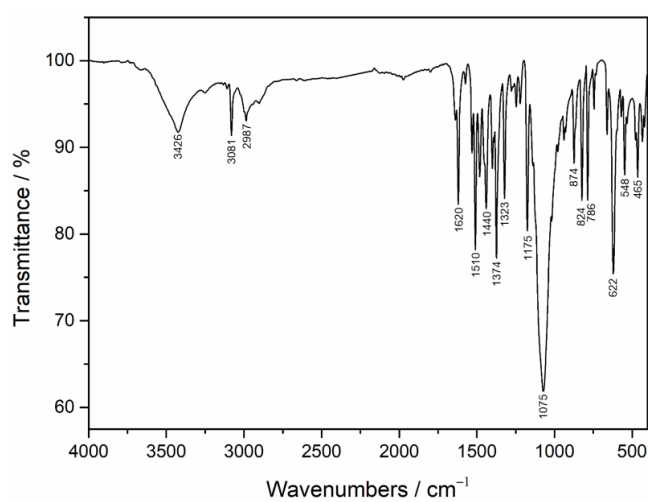

**Figure S8** Infrared spectrum of complex **6<sub>Co</sub>** at room temperature.

## 2. The synthesis of NIT-2-TrzPm radical

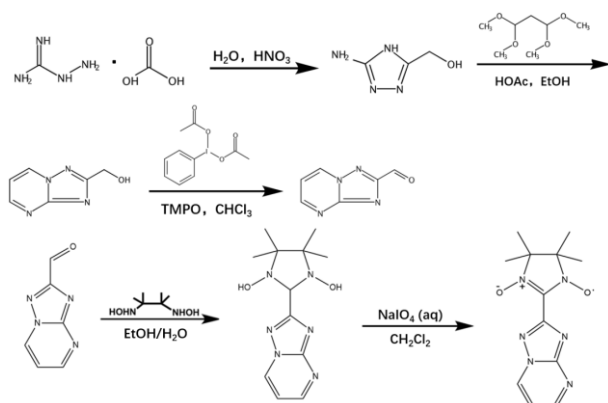

**Scheme S1** The synthesis of **NIT-2-TrzPm** radical.

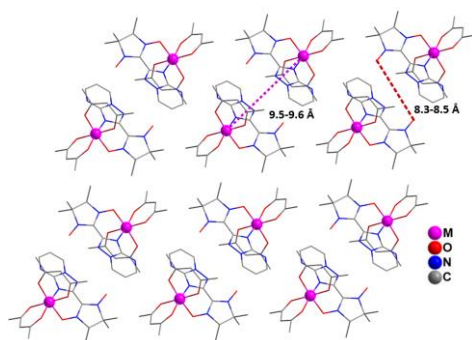

**Figure S9** Packing diagram of **1<sub>Mn</sub>** and **2<sub>Co</sub>** (H, F, and CH<sub>2</sub>Cl<sub>2</sub> molecules are omitted).

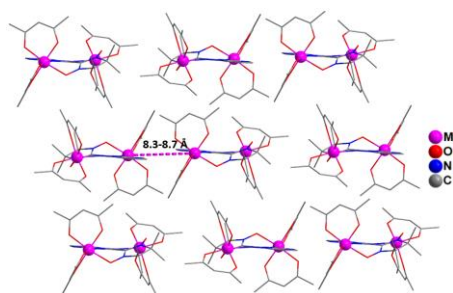

**Figure S10** Packing diagram of **3<sub>Mn</sub>** and **4<sub>Co</sub>** (H and F are omitted).

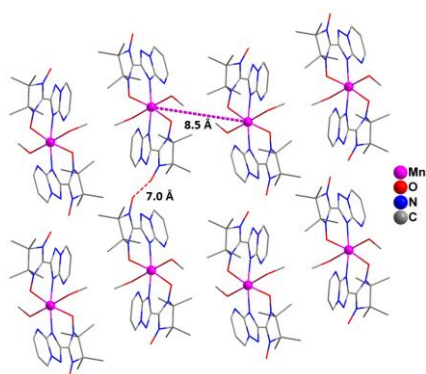

**Figure S11** Packing diagram of **5<sub>Mn</sub>** (H, ClO<sub>4</sub><sup>-</sup> and methanol solvent molecules are omitted).

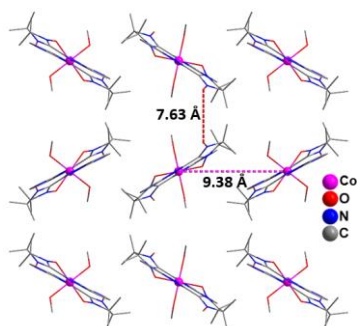

**Figure S12** Packing diagram of **6<sub>Co</sub>** (H, ClO<sub>4</sub><sup>-</sup> and methanol solvent molecules are omitted).



### 3. Magnetic Properties

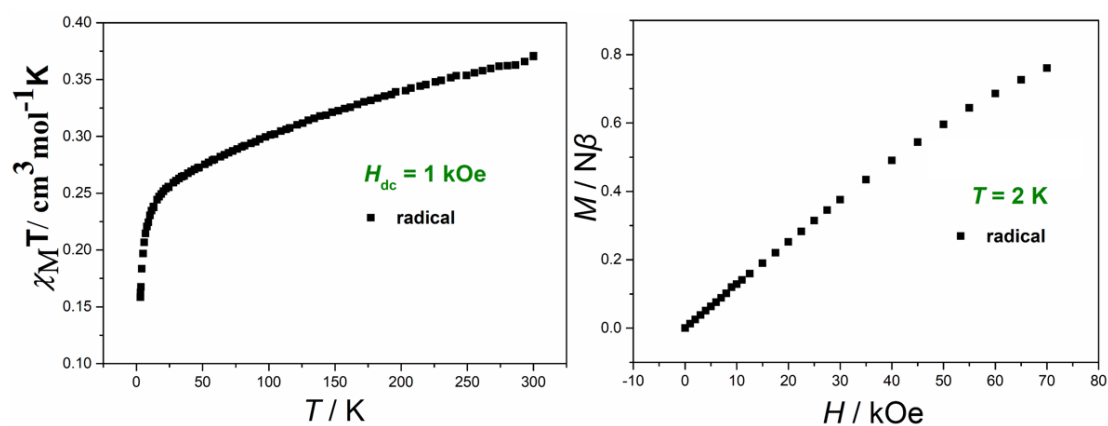

**Figure S13** Temperature-dependent dc magnetic susceptibility data measured at 1 kOe (left) and field-dependent magnetizations at 2 K (right) of NIT-2-TrzPm radical.

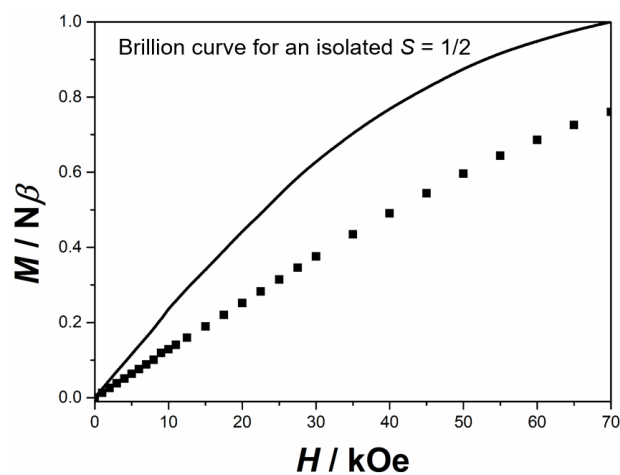

**Figure S14** The field-dependent magnetization curve of NIT-2-TrzPm radical at 2 K. The solid line represents the calculated Brillouin curve for an isolated  $S = 1/2$ .

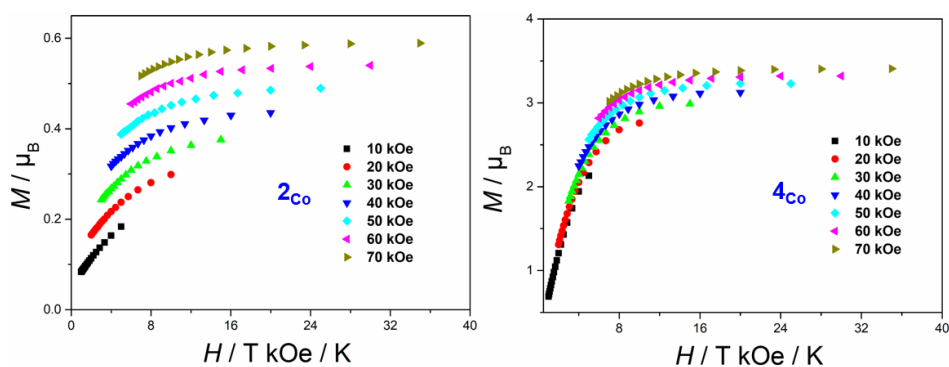

**Figure S15** The reduced magnetization data of  $2\text{Co}$  and  $4\text{Co}$  collected under various applied DC fields.

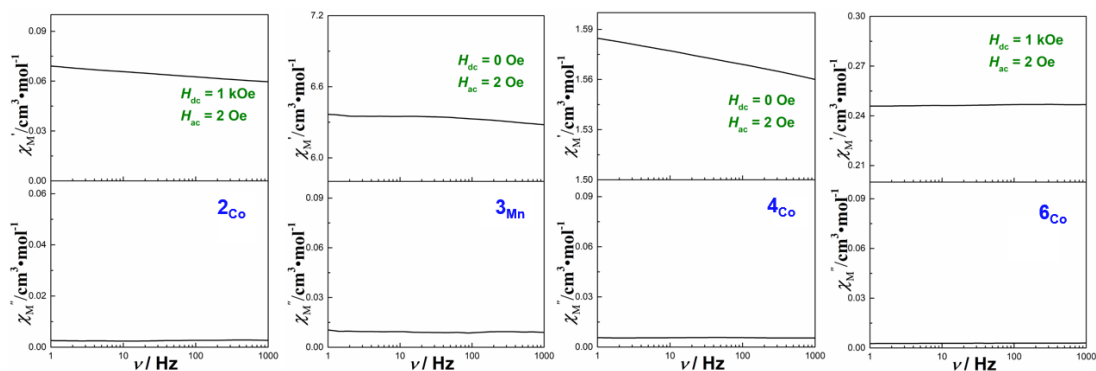

**Figure S16** Frequency-dependent ac signals for **2Co**, **3Mn**, **4Co** and **6Co** at 2 K under a 0 or 1 kOe dc field.

**Table S10** Relaxation fitting parameters from the least-square fitting of the Cole-Cole plots of **4Co** under a 1 kOe dc field according to the generalized Debye model.

| Temperature / K | $\chi_s / \text{cm}^3\text{mol}^{-1}$ | $\chi_T / \text{cm}^3\text{mol}^{-1}$ | $\tau / \text{s}$ | $\alpha$   |
|-----------------|---------------------------------------|---------------------------------------|-------------------|------------|
| 2.0             | 0.186                                 | 2.09                                  | 0.000891          | 0.21120    |
| 2.2             | 0.163                                 | 1.91                                  | 0.000697          | 0.21386    |
| 2.4             | 0.204                                 | 1.75                                  | 0.000562          | 0.17164    |
| 2.6             | 0.206                                 | 1.62                                  | 0.000448          | 0.14763    |
| 2.8             | 0.222                                 | 1.51                                  | 0.000359          | 0.11213    |
| 3.0             | 0.226                                 | 1.43                                  | 0.000283          | 0.095347   |
| 3.2             | 0.226                                 | 1.31                                  | 0.000217          | 0.047837   |
| 3.4             | 0.215                                 | 1.24                                  | 0.000169          | 0.029989   |
| 3.6             | 0.199                                 | 1.20                                  | 0.000128          | 0.031412   |
| 3.8             | 0.231                                 | 1.15                                  | 0.000104          | 0.013481   |
| 4.0             | 0.295                                 | 1.11                                  | 0.0000883         | 0.00073194 |

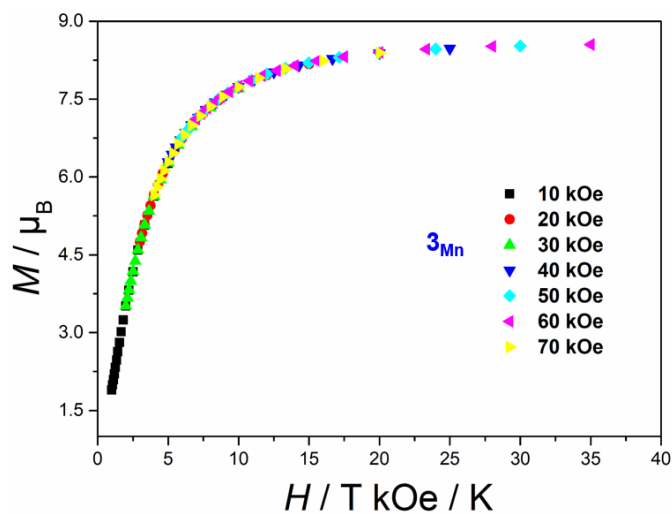

**Figure S17** The reduced magnetization data of **3Mn** collected under various applied DC fields.

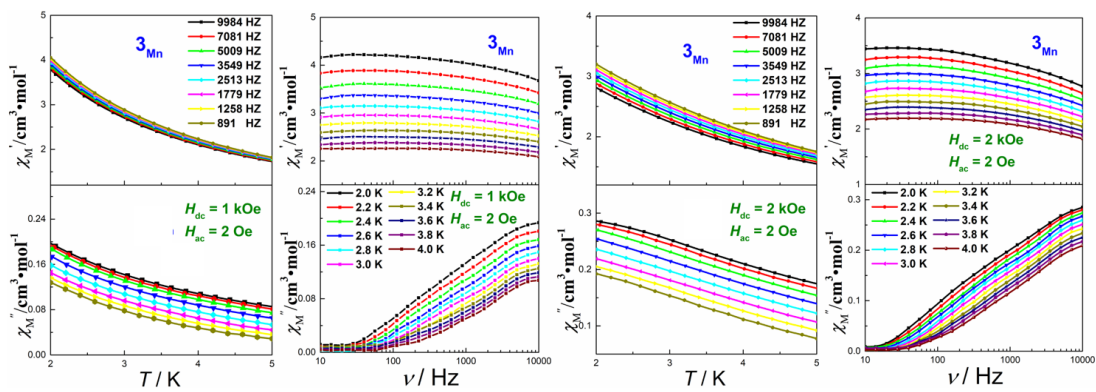

**Figure S18** Temperature- and frequency-dependent ac magnetic susceptibility data obtained for complex  $3_{Mn}$  in a 1000 and 2000 Oe dc field.
